# Supplementary material for: Association between MGMT Enhancer Methylation and MGMT Promoter Methylation, MGMT Protein Expression, and Overall Survival in Glioblastoma
Source: MDPI journal article supplement (doi:10.3390/cells12121639), 2023-06-15
Supplement: s1 [file s1]

*Supplementary R-packages*

# **Association between *MGMT* Enhancer Methylation and *MGMT* Promoter Methylation, *MGMT* Protein Expression, and Overall Survival in Glioblastoma**

Katja Zappe <sup>1</sup>, Katharina Pühringer <sup>1</sup>, Simon Pflug <sup>1</sup>, Daniel Berger <sup>1</sup>, Andreas Böhm <sup>1</sup>, Sabine Spiegl-Kreinecker <sup>2</sup>,  
and Margit Cichna-Markl <sup>1,\*</sup>

---

David Robinson, Alex Hayes and Simon Couch (2022). broom: Convert Statistical Objects into Tidy Tibbles. R package version 1.0.1. <https://CRAN.R-project.org/package=broom>

Taiyun Wei and Viliam Simko (2021)corrplot: Visualization of a Correlation Matrix (Version 0.92). <https://CRAN.R-project.org/package=corrplot>

Winston Chang (2014). extrafont: Tools for Using Fonts. R package version 0.17. <https://CRAN.R-project.org/package=extrafont>

Hadley Wickham (2021). forcats: Tools for Working with Categorical Variables (Factors). R package version 0.5.1. <https://CRAN.R-project.org/package=forcats>

Luke Smith (2016). ggloop: Create 'ggplot2' Plots in a Loop. R package version 0.1.0. <https://github.com/seasmith/ggloop>

Hadley Wickham (2016). ggplot2: Elegant Graphics for Data Analysis. Springer-Verlag New York. <https://ggplot2.tidyverse.org>

Alboukadel Kassambara (2020). ggpubr: 'ggplot2' Based Publication Ready Plots. R package version 0.4.0. <https://CRAN.R-project.org/package=ggpubr>

Gregory R. Warnes, Ben Bolker and Thomas Lumley (2021). gtools: Various R Programming Tools. R package version 3.9.2. <https://CRAN.R-project.org/package=gtools>

Stefan Milton Bache and Hadley Wickham (2020). magrittr: A Forward-Pipe Operator for R. R package version 2.0.1. <https://CRAN.R-project.org/package=magrittr>

Henrik Bengtsson (2022). matrixStats: Functions that Apply to Rows and Columns of Matrices (and to Vectors). R package version 0.62.0. <https://CRAN.R-project.org/package=matrixStats>

Simon Wood (2017) Generalized Additive Models: an introduction with R (2nd edition), CRC, New York. <https://CRAN.R-project.org/package=mgcv>

Philipp Schauburger and Alexander Walker (2021). openxlsx: Read, Write and Edit xlsx Files. R package version 4.2.4. <https://CRAN.R-project.org/package=openxlsx>

Bill Venables and Kurt Hornik and Martin Maechler (2019). polynom: A Collection of Functions to Implement a Class for Univariate Polynomial Manipulations. R package version 1.4-0. <https://CRAN.R-project.org/package=polynom>

Alboukadel Kassambara (2021). rstatix: Pipe-Friendly Framework for Basic Statistical Tests. R package version 0.7.0. <https://CRAN.R-project.org/package=rstatix>

Hadley Wickham and Dana Seidel (2020). scales: Scale Functions for Visualization. R package version 1.1.1. <https://CRAN.R-project.org/package=scales>

signal developers (2013). signal: Signal processing. <http://r-forge.r-project.org/projects/signal/>

Hadley Wickham (2019). stringr: Simple, Consistent Wrappers for Common String Operations. R package version 1.4.0. <https://CRAN.R-project.org/package=stringr>

Terry Therneau (2022). A Package for Survival Analysis in R. R package version 3.4-0. <https://CRAN.R-project.org/package=survival>

Alboukadel Kassambara, Marcin Kosinski and Przemyslaw Biecek (2021). survminer: Drawing Survival Curves using 'ggplot2'. R package version 0.4.9. <https://CRAN.R-project.org/package=survminer>

Wickham et al., (2019). Welcome to the tidyverse. Journal of Open Source Software, 4(43), 1686. <https://doi.org/10.21105/joss.01686>

Simon Garnier, Noam Ross, Robert Rudis, Antônio P. Camargo, Marco Sciaini, and Cédric Scherer (2021). Rvision - Colorblind-Friendly Color Maps for R. R package version 0.6.2. <https://sjmgarnier.github.io/viridis/>
