# Supplementary material for: Association between MGMT Enhancer Methylation and MGMT Promoter Methylation, MGMT Protein Expression, and Overall Survival in Glioblastoma
Source: MDPI journal article supplement (doi:10.3390/cells12121639), 2023-06-15
Supplement: s1 [file s1]

*Supplementary Tables*

# **Association between *MGMT* Enhancer Methylation and *MGMT* Promoter Methylation, *MGMT* Protein Expression, and Overall Survival in Glioblastoma**

Katja Zappe <sup>1</sup>, Katharina Pühringer <sup>1</sup>, Simon Pflug <sup>1</sup>, Daniel Berger <sup>1</sup>, Andreas Böhm <sup>1</sup>, Sabine Spiegl-Kreinecker <sup>2</sup>, and Margit Cichna-Markl <sup>1,\*</sup>

---

**Table S1.** Optimized PCR conditions.

| primer set    | PCR mix | primer conc. | initial activation | PCR program  |              |              |        | final elongation |
|---------------|---------|--------------|--------------------|--------------|--------------|--------------|--------|------------------|
|               |         |              |                    | denaturation | annealing    | elongation   | cycles |                  |
| enhancer 1    | mix 1   | 400 nM       | 95.0°C, 5 min      | 94.0°C, 15 s | 56.4°C, 30 s | 68.0°C, 30 s | 50     | 68.0°C, 10 min   |
| enhancer 2(A) | mix 2   | 400 nM       | 95.0°C, 15 min     | 94.0°C, 10 s | 59.0°C, 20 s | 68.0°C, 20 s | 50     | 68.0°C, 5 min    |
| enhancer 2(B) | mix 2   | 400 nM       | 95.0°C, 15 min     | 94.0°C, 10 s | 58.0°C, 20 s | 68.0°C, 20 s | 50     | 68.0°C, 5 min    |
| enhancer 2(C) | mix 2   | 400 nM       | 95.0°C, 15 min     | 94.0°C, 10 s | 58.0°C, 20 s | 68.0°C, 20 s | 50     | 68.0°C, 5 min    |
| enhancer 2(D) | mix 2   | 400 nM       | 95.0°C, 15 min     | 94.0°C, 10 s | 58.0°C, 20 s | 68.0°C, 20 s | 50     | 68.0°C, 5 min    |
| enhancer 3    | mix 1   | 400 nM       | 95.0°C, 5 min      | 94.0°C, 30 s | 52.6°C, 30 s | 72.0°C, 30 s | 45     | 72.0°C, 10 min   |
| enhancer 4(A) | mix 3   | 200 nM       | 95.0°C, 5 min      | 94.0°C, 15 s | 53.6°C, 30 s | 72.0°C, 30 s | 50     | 72.0°C, 10 min   |
| enhancer 4(B) | mix 3   | 200 nM       | 95.0°C, 5 min      | 94.0°C, 15 s | 56.5°C, 30 s | 68.0°C, 30 s | 50     | 68.0°C, 10 min   |
| enhancer 4(C) | mix 3   | 200 nM       | 95.0°C, 5 min      | 94.0°C, 15 s | 54.4°C, 30 s | 68.0°C, 30 s | 50     | 68.0°C, 10 min   |
| enhancer 4(D) | mix 3   | 400 nM       | 95.0°C, 5 min      | 94.0°C, 15 s | 54.2°C, 30 s | 72.0°C, 30 s | 50     | 72.0°C, 10 min   |
| promoter      | mix 1   | 400 nM       | 95.0°C, 5 min      | 94.0°C, 30 s | 56.0°C, 30 s | 72.0°C, 30 s | 45     | 72.0°C, 10 min   |

mix 1: 1x EpiTect HRM Master Mix (Qiagen) in RNase-free water

mix 2: 1x PCR master mix consisting of 2.5 U HotStarTaq DNA Polymerase (Qiagen) in 1x supplied PCR Buffer, 200 nM of each dNTP (PCR grade dNTP mix, Qiagen), and 1x EvaGreen dye (Biotium, USA) in RNase-free water

mix 3: 1x Type-it HRM PCR Master Mix (Qiagen) in RNase-free water

primer conc.: concentration of each primer

**Table S2.** Dispensation orders for PSQ.

| primer set    | dispensation order                                                                                                   |
|---------------|----------------------------------------------------------------------------------------------------------------------|
| enhancer 1    | GTTAGCTATATGTATAGTCAGTCGTATATGTCTGTATGTCTAGTCTGTTAGGATATGTGTGA-TATCAGTCTGTAGTATATGTGTAGTCGTTG                        |
| enhancer 2(A) | TGTTGTGTGTAGTCGTGTAGCTATAGTCGATGATCGTGTAGTAGTCGTG                                                                    |
| enhancer 2(B) | ACGATACGATCTACGATCGATATCGATACTACTCATACGATCGATCAGATATATCGACAT                                                         |
| enhancer 2(C) | AGTATCGATAGTCGAGTAGCTATATGTAAAGTATGTTGTGAGAGTGAGTATGAGAG-TGTGTCGTGTATATGTTGTATATATATAGTAGAGTGATGATATAGTAGGTAGTATCGTA |
| enhancer 2(D) | TGTAGTCGATATGCTATATAGTATTGATCAGTCGTA                                                                                 |
| enhancer 3    | ATCGTTGAGATGTGATCGTTGCTGATCAGTCAGTCGTGATTCTGTTGTGATCTGTAGATAGTGTATATGTCC                                             |
| enhancer 4(A) | CGATCTATGATACTTCTCACACACACACACACAGATATTATACACGACAC                                                                   |
| enhancer 4(B) | GTGCTATGTCGAGATATATATAGTGTATAGTGTAGTATATGTAGTATGAGATATATAGTCTGAT                                                     |
| enhancer 4(C) | AGCTATGATGTGTATCGTGAGTATATTGTGTGTGTAGTCAGTTCGTGTTGTATATATGAT-TAATGTATAGTCGTATGATCTGTG                                |
| enhancer 4(D) | CATATGATATACTACTATCGATCAGATATCAAGAACTACAGATAC                                                                        |
| promoter      | GTCAGTCGTTAGTATCGCTTAGTCAGTTCGTATCAGTCTGTATGTTCTAGTCGTAGTCGTGATCTGTAGTCGAT                                           |
